# Supplementary material
Source: Elsevier journal article supplement (https://www.sciencedirect.com/science/article/pii/S0210569116000498)
Supplement: mmc1 [file S0210569116000498:mmc1.doc]

Tabla 2: Fármacos implicados en los errores de programación interceptados no considerados de alto riesgo

| **FÁRMACO** | **LÍMITE** | **PROGRAMACIÓN** | **ACCIÓN** | **Na** | **% DE VARIACIÓNb** |
| --- | --- | --- | --- | --- | --- |
| Aciclovir | Mínima dosis 5 mg/kg en 1 h | Dosis de 1,5 mg/kg en 1 h | Reprogramado a 15 mg/kg en 1 h | 1 | 70 |
| Dosis 10-20 mg/kg en 1 h | Dosis de 10 mg/kg en 30 min | Reprogramado 10 mg/kg en 1 h | 1 | 50 |
| Albúmina | En reposición máxima velocidad de infusión 200 mg/min | 360 mg/min | Reprogramado a 200 mg/min | 4 | 80 |
| 400 mg/min | Reprogramado a 100 mg/min | 1 | 100 |
| 670 mg/min | Cancelado | 3 | 235 |
| 700 mg/min | Reprogramado a 70 mg/min | 1 | 250 |
| Amoxicilina/  clavulánico | Máxima dosis de 25-33,3 mg/kg en 30 min | Infusión en 3 min | Reprogramado en 30 min | 1 | 90 |
| Infusión en 1,5 h | Reprogramado en 30 min | 1 | 200 |
| Ampicilina | Máxima dosis de 100 mg/kg en 10 min | Dosis de 400 mg/kg | Reprogramado a 100 mg/kg | 1 | 300 |
| Basiliximab | Dosis en 30 min | Dosis en 20 min | Reprogramado en 30 min | 1 | 3 |
| Ciprofloxacino | Dosis 10-15 mg/kg en 1h | Dosis de 15 mg/kg en 10 min | Reprogramado en 1 h | 1 | 83 |
| Claritromicina | Máxima dosis de 7,5 mg/kg en 1 h | Infusión en 24 min | Reprogramado en 1 h | 1 | 60 |
| Colistina | Máxima dosis de 1,2-2,7 mg/kg en 5 min | Dosis de 80 mg/kg | Cancelación | 1 | 2.863 |
| Infusión en 2 min | Reprogramado en 5 min | 1 | 60 |
| Dexketoprofeno | Dosis 1 mg/kg en 30 min | Dosis en 10 min | Reprogramado en 30 min | 2 | 67 |
| Dosis en 5 min | Cancelado | 2 | 83 |
| Fluconazol | Máxima velocidad de infusión 6 mg/kg en 1 h | Infusión en 15 min | Reprogramado en 60 min | 2 | 75 |
| Infusión al doble de velocidad | Reprogramado en 2 h | 8 | 100 |
| Infusión en 20 min | Reprogramado en 60 min | 1 | 67 |
| Ig anti CMV | Máxima velocidad de infusión 67 U/kg/h | 134 U/kg/h | Reprogramado | 2 | 100 |
| 80 U/kg/h | Reprogramado a 50 U/kg/h | 1 | 19 |
| Ig inespecíficas | Máxima velocidad de infusión 5 mL/kg/h | Infusión al doble de velocidad | Cancelación | 1 | 100 |
| Linezolid | Máxima dosis de 10 mg/kg en 30 min | Dosis programada en 15 min | Dosis reprogramada en 30 min | 1 | 100 |
| Meropenem | Máxima dosis de 20-40 mg/kg en 3 min | Infusión en 9 min | Reprogramado en 3 min | 1 | 200 |
| Metamizol en Infusión continua | Máxima velocidad de infusión 6,6 mg/kg/h | Velocidad  12 mg/kg/h | Reprogramado a 6,6 mg/kg/h | 5 | 82 |
| Velocidad  40 mg/kg/h | 1 | 506 |
| Velocidad  80 mg/kg/h | 1 | 1.112 |
| Velocidad  150 mg/kg/h | 3 | 2.173 |
| Velocidad de infusión de  500 mg/kg/h | 1 | 7.476 |
| Metamizol | Máxima dosis de 20-40 mg/kg en 5 min | Dosis programada en 2,5 min | Reprogramado en 5 min | 1 | 900 |
| Dosis programada en 1 min | Reprogramado en 5 min | 1 | 50 |
| Dosis de 400 mg/kg | Reprogrammed | 1 | 80 |
| Dosis de 40 mg/kg en 0,5-2 min | Reprogrammed | 26 | 90 |
| Metilprednisolona | Máxima velocidad de infusión en perfusión continua 5,4 mg/kg/h | 25 mg/kg/h | Reprogramado a 5,4 mg/kg/h | 1 | 363 |
| Micafungina | Dosis máxima 12 mg/kg en 1 h | Dosis de 10 mg/kg en 45 min | Reprogramado en 1 h | 3 | 25 |
| Nimodipino | Máxima velocidad de infusión 30 mcg/kg/h | 45 mcg/kg/h | Reprogramado a 30 mcg/kg/h | 2 | 50 |
| Octreótido | Máxima velocidad de infusión 10 mcg/kg/h | 375 mcg/kg/h | Reprogramado a 3,75 mcg/kg/h | 1 | 3.650 |
| Omeprazol | Máxima dosis de 1 mg/kg en 20 min | Infusión en 10 min | Reprogramado en 20 min | 2 | 50 |
| Infusión en 5 min | 2 | 75 |
| Infusión en 2 min | 2 | 90 |
| Infusión en 1 min | 2 | 95 |
| Piperacilina/  tazobactam | Máxima dosis de 100 mg/kg en 30 min | Volumen a infundir diez veces superior | Reprogramada la dosis correcta | 2 | 900 |
| Dosis de 200 mg/kg | Cancelación | 1 | 100 |
| Dosis de 80 mg/kg en bolo de 1,5 min | Reprogramado en 30 min | 3 | 95 |
| Ranitidina | Máxima velocidad de administración 10 mg/min | 30 mg/min | Rerpogramado a 1,5 mg/min | 2 | 200 |
| 50 mg/min | 3 | 400 |
| Sulfametoxazol/  trimetoprim | Máxima dosis de 5-7 mg/kg en 1 h | Infusión en 26 min | Reprogramado en 40 min | 2 | 57 |
| Infusión en 20 min | Reprogramado en 1 h | 1 | 67 |
| Dosis en 8 min | Reprogramado en 30 min | 1 | 73 |
| Teicoplanina | Máxima dosis de 10 mg/kg en 30 min | Dosis programmed en 10 min | Dosis reprogramada en 1 h | 1 | 83 |
| Vitamin K | Máxima velocidad de administración 1 mg/min | 10 mg en 2 min | Reprogramado en 10 min | 1 | 400 |
| 2 mg/min | Reprogramado a 1 m/min | 3 | 100 |
| Voriconazol | Máxima dosis de 3 mg/kg/h or 200 mg en 1 h | Dosis de 500 mg en 1 h | Reprogramado en 2,5 h | 1 | 150 |
| Dosis de 30 mg/kg | Rerprogramado a 3 mg/kg | 2 | 900 |
| Dosis en 20 min | Rerpogramado en 1 h | 1 | 67 |

**Na**: Número de errores

**% DE VARIACIÓNb:** porcentaje de variación de la infusión programada respecto al límite establecido
